# Supplementary material for: Data-Based Variables Used as Indicators of Dairy Cow Welfare at Farm Level: A Review
Source: MDPI journal article supplement (doi:10.3390/ani11123458), 2021-12-04
Supplement: s1 [file animals-1387948-supplementary.pdf › animals-1387948-supplementary.pdf]

**Table S1.** Associations between data-based variables (DBVs) based on cow age and animal-based measurements (ABMs) extracted from two scientific publications.

| DBV                            | ABM                             | Type <sup>1</sup> and direction <sup>2</sup> | Reference |
|--------------------------------|---------------------------------|----------------------------------------------|-----------|
| Average age                    | Frequency of head butts         | {~}                                          | [1]       |
|                                | Qualitative Behavior Assessment | {~}                                          | [1]       |
|                                | Cows with vulvar discharge      | {-}                                          | [1]       |
| Average age of cattle >2 years | Severely lame cows              | ( )                                          | [2]       |
| Cows ≥2nd lactation (%)        | Dirty young stock               | {+}                                          | [3]       |
| Cows aged >5 years (%)         | Cows with hairless patches      | {~}                                          | [1]       |
|                                | Cows lying outside lying area   | {-}                                          | [1]       |
|                                | Cows with nasal discharge       | {-}                                          | [1]       |
|                                | Cows with vulvar discharge      | {+}                                          | [1]       |

<sup>1</sup> Type of associations indicated by ( ) for univariable associations and { } for multivariable associations.

<sup>2</sup> Direction of associations indicated by + for positive associations, - for negative associations, and ~ for nonlinear associations, empty brackets indicate that no direction was given.

**Table S2.** Associations between data-based variables (DBVs) addressing herd disease status or herd biosecurity status and animal-based measurements (ABMs) extracted from two scientific publications.

| DBV                                      | ABM                              | Type <sup>1</sup> and direction <sup>2</sup> | Reference |
|------------------------------------------|----------------------------------|----------------------------------------------|-----------|
| Certified disease-free «BVD»             | Frequency of displacements       | {+}                                          | [1]       |
|                                          | Cows with dirty hindquarter      | ( )                                          | [2]       |
|                                          | Collisions with stall components | {-}                                          | [1]       |
|                                          | Time needed to lie down          | {+}                                          | [1]       |
|                                          | Cows with diarrhoea              | {+}                                          | [1]       |
|                                          | Cows with vulvar discharge       | {-}                                          | [1]       |
| Certified disease-free «IBR»             | Lean or very lean cows           | ( )                                          | [2]       |
|                                          | Cows with diarrhoea              | {+}                                          | [1]       |
| Certified disease-free «Salmonella»      | Severely lame cows               | {-}                                          | [1]       |
|                                          | Dystocia %                       | {-}                                          | [1]       |
| Herd biosecurity status<br>(open/closed) | Cows with dirty hindquarter      | ( )                                          | [2]       |
|                                          | Severely lame cows               | ( )                                          | [2]       |

Abbreviations: BVD = Bovine Virus Diarrhea, IBR = Infectious Bovine Rhinotracheitis

<sup>1</sup> Type of associations indicated by ( ) for univariable associations and { } for multivariable associations.

<sup>2</sup> Direction of associations indicated by + for positive associations, - for negative associations, empty brackets indicate that no direction was given.

**Table S3.** Associations between data-based variables (DBVs) addressing farm net results and animal-based measurements (ABMs) extracted from two scientific publications.

| DBV                      | ABM                         | Type <sup>1</sup> and direction <sup>2</sup> | Reference |
|--------------------------|-----------------------------|----------------------------------------------|-----------|
| Net result (€)           | Frequency of displacements  | ( )                                          | [2]       |
|                          | Cows with dirty hindquarter | ( )                                          | [2]       |
| Change in net result (%) | Cows with dirty legs        | {-}                                          | [1]       |
|                          | Cows with diarrhoea         | {-}                                          | [1]       |

<sup>1</sup> Type of associations indicated by ( ) for univariable associations and { } for multivariable associations.

<sup>2</sup> Direction of associations indicated - for negative associations, empty brackets indicate that no direction was given.

**Table S4.** Associations between data-based variables (DBVs) addressing culling reasons and animal-based measurements (ABMs) extracted from one scientific publication

| DBV                                    | ABM                              | Type <sup>1</sup> and direction <sup>2</sup> | Reference |
|----------------------------------------|----------------------------------|----------------------------------------------|-----------|
| Voluntary culling (%)                  | Dirty calves                     | {+}                                          | [3]       |
|                                        |                                  | (+)                                          | [3]       |
| Culling, overall (%)                   | Rising abnormal/ impaired        | (+)                                          | [3]       |
|                                        | Lean calves                      | (-)                                          | [3]       |
| Culling for claw and leg disorders (%) | Dirty calves                     | (-)                                          | [3]       |
|                                        | Cows with injuries/ inflammation | {+}                                          | [3]       |

<sup>1</sup> Type of associations indicated by ( ) for univariable associations and { } for multivariable associations.

<sup>2</sup> Direction of associations indicated by + for positive associations, - for negative associations

**Table S5.** Associations between data-based variables (DBVs) addressing veterinary diagnoses or treatments and animal-based measurements (ABMs) extracted from two scientific publications

| DBV                                      | ABM                         | Type <sup>1</sup> and direction <sup>2</sup> | Reference |
|------------------------------------------|-----------------------------|----------------------------------------------|-----------|
| Treatments per cow year (90d)            | Cows with dirty udder       | (+)                                          | [4]       |
| Treatments locomotor disorders (90d)     | Avoidance distance, shyness | (+)                                          | [4]       |
| Treatments locomotor disorders (180d)    | Lean or very lean cows      | (-)                                          | [4]       |
| Proportion of locomotor disorders (365d) | Cows with dirty hindquarter | (+)                                          | [4]       |
| Proportion of locomotor disorders (90d)  | Severely lame cows          | (+)                                          | [4]       |
| Proportion of locomotor disorders (180d) | Rising abnormal/ impaired   | (+)                                          | [4]       |
|                                          | Lean calves                 | {+}                                          | [3]       |
|                                          | Lean young stock            | (+)                                          | [3]       |
|                                          | Dirty cows                  | {+}                                          | [3]       |
| Incidence of mastitis treatment          | Lean or very lean cows      | {+}                                          | [3]       |

<sup>1</sup> Type of associations indicated by ( ) for univariable associations and { } for multivariable associations.

<sup>2</sup> Direction of associations indicated by + for positive associations, - for negative associations

**Table S6.** Associations between data-based variables (DBVs) based on slaughterhouse data and animal-based measurements (ABMs) extracted from three scientific publication

| DBV                                   | ABM                                 | Type <sup>1</sup> and direction <sup>2</sup> | Reference |
|---------------------------------------|-------------------------------------|----------------------------------------------|-----------|
| No remarks at slaughter (%)           | Cows with injuries and inflammation | (-)                                          | [3]       |
| Proportion of abattoir remarks (180d) | impaired hair coat                  | (+)                                          | [4]       |
|                                       | Lean or very lean cows              | (-)                                          | [4]       |
| Proportion of abattoir remarks (365d) | impaired hair coat                  | (+)                                          | [4]       |
|                                       | Integument alterations body         | (-)                                          | [4]       |
| Lean cows at slaughter (90d)          | Impaired hair coat                  | (+)                                          | [4]       |
|                                       | Lean or very lean cows              | (-)                                          | [4]       |
|                                       | Cows with dirty hindquarter         | (+)                                          | [4]       |
| Lean cows at slaughter (365d)         | Impaired hair coat                  | (+)                                          | [4]       |
|                                       | Integument alterations body         | (-)                                          | [4]       |
|                                       | Integument alterations tarsus       | (+)                                          | [4]       |
| Chronic inflammation (180d)           | Cows with dirty hindquarter         | (-)                                          | [4]       |
|                                       | Cows with dirty legs                | (-)                                          | [4]       |
|                                       | Cows with dirty udder               | (-)                                          | [4]       |
| Chronic inflammation (365d)           | Cows with dirty legs                | (-)                                          | [4]       |
|                                       | Cows with dirty udder               | (-)                                          | [4]       |
| Liver abscesses (180d)                | Cows with dirty hindquarter         | (-)                                          | [4]       |
|                                       | Cows with dirty legs                | (-)                                          | [4]       |
| Liver abscesses (365d)                | Integument alterations tarsus       | (+)                                          | [4]       |
|                                       | Avoidance distance, shyness         | (+)                                          | [4]       |
| Lung disorders (180d)                 |                                     |                                              |           |
| Peritonitis (180d)                    |                                     |                                              |           |

## References

1. de Vries, M.; Bokkers, E.A.M.; van Schaik, G.; Engel, B.; Dijkstra, T.; de Boer, I.J.M. Exploring the value of routinely collected herd data for estimating dairy cattle welfare. *J. Dairy Sci.* **2014**, *97*, 715–730.
2. de Vries, M.; Bokkers, E.A.M.; van Schaik, G.; Engel, B.; Dijkstra, T.; de Boer, I.J.M. Improving the time efficiency of identifying dairy herds with poorer welfare in a population. *J. Dairy Sci.* **2016**, *99*, 8282–8296.
3. Sandgren, C.H.; Lindberg, A.; Keeling, L.J. Using a national dairy database to identify herds with poor welfare. *Anim. Welf.* **2009**, *18*, 523–532.
4. Otten, N.D.; Rousing, T.; Houe, H.; Thomsen, P.T.; Sørensen, J.T. Comparison of animal welfare indices in dairy herds based on different sources of data. *Anim. Welf.* **2016**, *25*, 207–215.
